# Supplementary material
Source: publisher site journal article supplement (https://www.dovepress.com/article/454620)
Supplement: Supplementary file 1 [file get_supplementary_file.php]

**Supplementary Material 1: Interview Guide**

**Interview Guide**

**Part I Introduction**

- Interviewer organization and the focus of the research.
- Explain research objectives, duration of the interview and confidentiality.
- Confirm consent to qualitative interview and audio recording.

**Part II Basic Demographic Survey**

ID: \_\_\_\_\_

Interview Date: Year \_\_\_\_ Month \_\_\_\_ Day \_\_\_\_

Interview Venue: \_\_\_\_\_

Duration of Interview: \_\_\_\_\_

*Please respond to the following questions based on your current situation. The interviewer will mark "√" in the appropriate option or you may fill in the response on the provided lines. If you have any uncertainties, kindly consult a member of the research team. Your cooperation is greatly appreciated.*

Age: \_\_\_\_\_ years

Gender:  Male  Female

Duration of Residency in Chongqing:  Yes  No

Marital Status:  Married  Single  Widowed  Divorced  Other \_\_\_\_\_

Educational Level:

- Elementary school and below
- Middle school
- High school
- College and above

Residence Years in Long-Term Care Facilities:

- Less than 1 year
- 1 - 3 years
- 4 - 7 years
- More than 7 years

Work History: \_\_\_\_\_

Personal Monthly Income: \_\_\_\_\_

Presence of Chronic Illness:  No  Yes \_\_\_\_\_

Requirement for Long-term Medication:  No  Yes \_\_\_\_\_

Medication Usage in the Last Month:  No  Yes \_\_\_\_\_

### Part III Interview Questions

| Dimensions                           | Questions                                                                                                                                                                                                                                                                                                                                                                                                                                                                                                                                                                                                                                                                                                                                                                                                                      |
|--------------------------------------|--------------------------------------------------------------------------------------------------------------------------------------------------------------------------------------------------------------------------------------------------------------------------------------------------------------------------------------------------------------------------------------------------------------------------------------------------------------------------------------------------------------------------------------------------------------------------------------------------------------------------------------------------------------------------------------------------------------------------------------------------------------------------------------------------------------------------------|
| Medication Information Cognition     | Are you aware of the importance of medication information, including indications, adverse effects, and contraindications? Can you identify your specific medication information needs in your daily medication use? Are you able to articulate your health condition needs for medication information during your daily medication use? Do you actively seek medication information for your well-being? Are you willing to accept medication guidance from professionals (pharmacists, health care professionals) in your daily life?                                                                                                                                                                                                                                                                                         |
| Medication Information Acquisition   | Can you obtain medication-related information through traditional media channels, such as popular science books or TV? Are you able to acquire medication-related information through new media channels like TikTok APP or WeChat official accounts? Do you actively seek help from others when trying to find specific medication information?                                                                                                                                                                                                                                                                                                                                                                                                                                                                               |
| Medication Information Understanding | Do you understand the indications, adverse effects, and contraindications of the medication you take, either through guidance from medical personnel or by reading the instruction manual? Can you comprehend the dosage, route of administration, and interval of the medication by reading the drug label or drug instructions? Are you able to understand the expiration date of the medication by reading the drug label or drug package? Do you understand the answers given by healthcare professionals to questions about medication use?                                                                                                                                                                                                                                                                               |
| Medication Information Evaluation    | Are you able to assess the reliability of sources providing medication information? Can you recognize inaccurate or exaggerated descriptions in medication information? Are you able to distinguish between medicines and health products? Can you select the medication information you need from a large amount of information?                                                                                                                                                                                                                                                                                                                                                                                                                                                                                              |
| Medication Information Application   | Can you summarize and organize the knowledge acquired about medication information in a timely and correct manner? Are you able to take medication correctly based on the guidance received? Can you observe your own reactions after taking medication and compare them with the adverse reactions mentioned in the drug instructions? Are you able to provide feedback to healthcare professionals regarding medication guidance, such as adverse reactions, when consulting them again? Can you store medications properly based on medication information, considering factors like protection from light and moisture? Do you stock up on medications according to provided information and regularly clean up expired medications? Are you able to share relevant medication information with others in a timely manner? |

### Part IV Closing Remarks

- Is there any additional information you would like to share?
- We sincerely appreciate your participation and valuable insights throughout this interview. Your contribution is immensely valuable to the success of our study. Thank you for your time and cooperation. If there's anything else you'd like to share, we are here to listen.

**Supplementary Material 2: Medication information literacy levels of the participants**

**Table1** Medication information literacy levels of the participants.

**Abbreviations:** CHD, coronary atherosclerotic heart disease; HT, hypertension; DM, diabetes mellitus; HL, hyperlipoidemia; CI, cerebral infarction; CGN, chronic glomerulonephritis; CC, colon cancer.

| Interviewees | Medication Information Cognition | Medication Information Acquisition | Medication Information Understanding | Medication Information Evaluation    | Medication Information Application | Total | Disease |
|--------------|----------------------------------|------------------------------------|--------------------------------------|--------------------------------------|------------------------------------|-------|---------|
|              | Dimension                        | Medication Information Cognition   | Medication Information Acquisition   | Medication Information Understanding | Medication Information Evaluation  |       |         |
| S1           | 15                               | 7                                  | 13.5                                 | 11                                   | 17.5                               | 64    | CHD, HT |
| S2           | 23                               | 10.5                               | 18                                   | 17.5                                 | 27                                 | 96    | CHD, HT |
| S3           | 17.5                             | 7.5                                | 15.5                                 | 11.5                                 | 23                                 | 75    | CI, HT  |
| S4           | 22                               | 10.5                               | 18.5                                 | 17                                   | 28                                 | 96    | CHD, HT |
| S5           | 19                               | 9.5                                | 16                                   | 16                                   | 24.5                               | 85    | CHD, HT |
| S6           | 18                               | 8                                  | 16                                   | 11                                   | 24.5                               | 77.5  | CHD, HT |
| S7           | 19.5                             | 11.5                               | 15.5                                 | 12.5                                 | 27.5                               | 86.5  | CI, HL  |
| S8           | 20.5                             | 9                                  | 18.5                                 | 12.5                                 | 28                                 | 88.5  | CHD, HT |
| S9           | 18.5                             | 9                                  | 15.5                                 | 13                                   | 23.5                               | 79.5  | HT      |
| S10          | 15                               | 6.5                                | 12.5                                 | 10                                   | 20                                 | 64    | HT      |
| S11          | 15                               | 8.5                                | 12                                   | 12.5                                 | 21                                 | 69    | CI, HT  |
| S12          | 15                               | 8                                  | 13                                   | 12                                   | 20                                 | 68    | HT      |
| S13          | 16                               | 8                                  | 13.5                                 | 13                                   | 20.5                               | 71    | CI, HT  |
| S14          | 15.5                             | 8                                  | 14                                   | 11                                   | 20                                 | 68.5  | HT      |
| S15          | 19                               | 7.5                                | 16.5                                 | 12                                   | 24                                 | 79    | HT      |
| S16          | 19                               | 7.5                                | 16                                   | 11                                   | 22.5                               | 76    | HT      |
| S17          | 17                               | 10                                 | 11                                   | 11                                   | 22.5                               | 71.5  | HT      |
| S18          | 17.5                             | 7.5                                | 14.5                                 | 10.5                                 | 24                                 | 74    | CI, HT  |

---

|     |      |      |      |      |      |       |                |
|-----|------|------|------|------|------|-------|----------------|
| S19 | 20.5 | 10.5 | 17.5 | 14   | 28   | 90.5  | CI, HT,<br>CGN |
| S20 | 22   | 10   | 17.5 | 12   | 27.5 | 89    | CI, HT         |
| S21 | 20   | 9.5  | 16   | 9    | 23   | 77.5  | HT             |
| S22 | 20   | 11   | 18   | 15.5 | 26   | 90.5  | CI, HT         |
| S23 | 24.5 | 11.5 | 18.5 | 18   | 28   | 100.5 | CI, HT, CC     |
| S24 | 23.5 | 11   | 17.5 | 15   | 28   | 95    | CHD, HT        |
| S25 | 19.5 | 9.5  | 16   | 9.5  | 24.5 | 79    | CI, HT         |
| S26 | 20   | 9.5  | 16   | 13.5 | 24.5 | 83.5  | HT             |
| S27 | 19.5 | 10.5 | 16   | 14.5 | 24   | 84.5  | /              |
| S28 | 16.5 | 9    | 15   | 11   | 22   | 73.5  | CI             |
| S29 | 22.5 | 11.5 | 18   | 16   | 27   | 95    | CI, HT         |
| S30 | 22.5 | 11.5 | 18.5 | 16.5 | 27   | 96    | CHD            |
| S31 | 20   | 8.5  | 16   | 16   | 24   | 84.5  | HT             |
| S32 | 18   | 10   | 12.5 | 12   | 21.5 | 74    | HT             |

---

**Table 2** Medication information literacy levels of the Groups

| Dimension              | Medication   | Medication   | Medication    | Medication   | Medication   | Total<br>(Mean±SD) |
|------------------------|--------------|--------------|---------------|--------------|--------------|--------------------|
|                        | Information  | Information  | Information   | Information  | Information  |                    |
| Group                  | Cognition    | Acquisition  | Understanding | Evaluation   | Application  | (Mean±SD)          |
|                        | (Mean±SD)    | (Mean±SD)    | (Mean±SD)     | (Mean±SD)    | (Mean±SD)    |                    |
| Proactive              |              |              |               |              |              |                    |
| Health                 |              |              |               |              |              |                    |
| Self-Managers<br>(n=9) | 22.22 ± 1.50 | 10.78 ± 0.87 | 17.83 ± 0.97  | 15.22 ± 2.33 | 27.56 ± 0.46 | 93.61 ± 4.56       |
| Medication             |              |              |               |              |              |                    |
| Information            |              |              |               |              |              |                    |
| Adherents<br>(n=12)    | 18.58 ± 1.49 | 8.92 ± 1.38  | 15.58 ± 1.81  | 12.08 ± 1.84 | 23.96 ± 1.96 | 79.13 ± 6.96       |
| Experience-Based       |              |              |               |              |              |                    |
| Medication             |              |              |               |              |              |                    |
| Users<br>(n=5)         | 17.80 ± 2.59 | 8.50 ± 1.22  | 14.50 ± 2.06  | 2.70 ± 3.27  | 22.50 ± 1.94 | 76.00 ± 9.33       |
| Nonadherent            |              |              |               |              |              |                    |
| Medication             |              |              |               |              |              |                    |
| Users<br>(n=6)         | 16.50 ± 1.48 | 8.50 ± 1.05  | 13.83 ± 1.17  | 12.00 ± 0.89 | 20.83 ± 2.04 | 71.67 ± 5.34       |
